# Supplementary material
Source: PubMed Central journal article supplement (PMC4227905)
Supplement: pr500484w_si_001.pdf [file pr500484w_si_001.pdf]

## **Correlation of phenotypic profiles using targeted proteomics identifies mycobacterial Esx-1 substrates**

Matthew M. Champion, Emily A. Williams, Richard S. Pinapati, and Patricia A. DiGiuseppe Champion

### Contents:

**Table S1:** Strains used in this study

**Table S2:** p values for relative differences between protein levels in the WT vs ESX-1-deficient strains

**Table S3:** *espK* and *espJ* paralogs in *M. marinum* are found in pairs

**Figure S1:** MRM Transitions monitored in this study

**Figure S2:** Western blot analysis for the production and secretion of EsxA and EsxB

**Figure S3:** Pearson correlation coefficients and significance for all proteins in this study

**Figure S4:** Log<sub>2</sub> transformed normalized area ratios for protein levels in the culture filtrates.

**Figure S5:** A model of Esx-1 export in *M. marinum*

**Figure S6:** R code used for calculating the significance of correlation

**Table S1: *M. marinum* strains used in this study**

| <b>Name</b>       | <b>Genotype</b>                             | <b>Reference</b>         |
|-------------------|---------------------------------------------|--------------------------|
| M strain          | Wild-type <i>M. marinum</i> , parent strain | Gao, LY et al. 2003      |
| $\Delta$ RD1      | $\Delta eccCb^2-espK$                       | Volkman, HE et al. 2004  |
| M1                | <i>espG1::Tn</i>                            | Gao, LY et al. 2004      |
| M2                | <i>espH::Tn</i>                             | Gao, LY et al. 2004      |
| M3                | <i>eccA1::Tn</i>                            | Gao, LY et al. 2004      |
| M4                | <i>eccA1::Tn</i>                            | Gao, LY et al. 2004      |
| 6B10              | <i>eccB1::Tn</i>                            | Champion, MM et al. 2012 |
| F11               | <i>eccB1::Tn</i>                            | This study               |
| Mh3871::Tn        | <i>eccCb::Tn</i>                            | Joshi, SA et al. 2012    |
| Mh $\Delta$ esxBA | $\Delta$ esxBA                              | Gao, LY et al. 2004      |
| Mh $\Delta$ esxA  | $\Delta$ esxA                               | Xu, J et al. 2007        |
| M5                | <i>espI::Tn</i>                             | Gao, LY et al. 2004      |
| 17                | <i>eccD1::Tn</i>                            | This study               |
| M6                | <i>espJ::Tn</i>                             | Gao, LY et al. 2004      |
| M7                | <i>espK::Tn</i>                             | Gao, LY et al. 2004      |
| 2                 | <i>espL::Tn</i>                             | This study               |
| M8                | <i>espB::Tn</i>                             | Gao, LY et al. 2004      |

**Table S2: p values for relative differences between protein levels in the WT vs ESX-1-deficient strains. “-” indicates a p value of <.0001. p values were determined by a two tailed Student’s t-test.**

**ESX-1 deficient *M. marinum* strains**

| Protein | Fraction | $\Delta$ RD1 | <i>espG1</i> | <i>eccA-1</i> | <i>eccA-2</i> | <i>eccB-1</i> | <i>eccB-2</i> | <i>eccCb</i> | $\Delta$ <i>esxBA</i> | $\Delta$ <i>esxA</i> | <i>espi</i> | <i>eccD1</i> | <i>espJ</i> | <i>espK</i> | <i>espl</i> | <i>espB</i> |
|---------|----------|--------------|--------------|---------------|---------------|---------------|---------------|--------------|-----------------------|----------------------|-------------|--------------|-------------|-------------|-------------|-------------|
| EsxB    | CL       | -            | .0234        | -             | .0028         | -             | .0012         | .8025        | -                     | -                    | .0443       | .0014        | .1334       | .4673       | .0074       | .0008       |
|         | CF       | -            | -            | -             | -             | -             | -             | -            | -                     | -                    | -           | -            | .0007       | -           | -           | -           |
| EsxA    | CL       | -            | .0352        | .0034         | .0241         | .0043         | .0152         | .0056        | -                     | -                    | .0777       | .9782        | .5244       | .3558       | .0145       | .0269       |
|         | CF       | .0002        | -            | -             | .0003         | -             | -             | -            | .0003                 | .0003                | .0012       | .0012        | .0277       | .0065       | -           | .0004       |
| EspF    | CL       | -            | -            | -             | -             | -             | -             | .0004        | -                     | -                    | -           | -            | .0093       | 0.0052      | -           | -           |
|         | CF       | -            | -            | -             | -             | -             | -             | .0006        | -                     | -                    | .0019       | .0003        | .0024       | -           | -           | -           |
| EspB    | CL       | .0022        | .0203        | .0059         | .0165         | .0002         | .0755         | .4230        | .1246                 | .6357                | .0013       | .2696        | .0097       | .5332       | .1054       | .0002       |
|         | CF       | -            | -            | -             | .0016         | -             | -             | -            | -                     | -                    | .0028       | .0021        | .0114       | .0007       | -           | -           |
| EspK    | CL       | -            | .6519        | -             | -             | -             | -             | .0001        | .0001                 | -                    | -           | .0005        | .0003       | -           | -           | .0003       |
|         | CF       | -            | -            | -             | -             | -             | -             | -            | -                     | -                    | -           | -            | -           | -           | -           | -           |
| PPE68   | CL       | -            | .0002        | .0008         | -             | .0014         | .0019         | .0003        | .0001                 | .0025                | .0019       | .0059        | .3745       | .0229       | -           | .0024       |
|         | CF       | -            | .0010        | .0100         | .0219         | -             | -             | -            | -                     | -                    | .0002       | .0393        | .0123       | .7889       | -           | .0012       |
| EspJ    | CL       | -            | .0009        | -             | -             | -             | .0017         | .0114        | .0023                 | .0002                | .0003       | .0030        | -           | -           | -           | -           |
|         | CF       | -            | -            | -             | -             | -             | -             | -            | -                     | -                    | -           | -            | -           | -           | -           | -           |
| EsxN    | CL       | .8178        | 1.000        | .0002         | .2012         | .0046         | .8309         | .0224        | .0054                 | .0051                | .2073       | .0384        | .9768       | .5303       | .0960       | .1597       |
|         | CF       | .0077        | .0072        | .0010         | .0067         | .0040         | .0027         | .8151        | .0267                 | .0085                | .0047       | .2239        | .2526       | .0062       | .0024       | .0130       |
| 2929    | CL       | .0146        | .0071        | -             | .3893         | .0002         | .0002         | .0247        | .0027                 | .0073                | .0003       | .0264        | .0034       | .7280       | .0005       | .0275       |
|         | CF       | .0172        | .2064        | .0284         | .5141         | .6989         | .0039         | -            | .0394                 | .0171                | .0064       | -            | .0059       | .0148       | .0003       | .0106       |

| <i>M. marinum</i> genes           | Comparison with EspJ <sub>MM</sub> or EspK <sub>MM</sub> |              |            | Best BLAST hit in <i>M. tb</i> H37Rv genome | Comparison with EspJ <sub>MT</sub> or EspK <sub>MT</sub> |              |            |
|-----------------------------------|----------------------------------------------------------|--------------|------------|---------------------------------------------|----------------------------------------------------------|--------------|------------|
|                                   | % identity                                               | % similarity | % coverage |                                             | % identity                                               | % similarity | % coverage |
| <i>MMAR_5453 (espJ)</i>           | 100                                                      | 100          | 100        | <i>rv3878 (espJ)</i>                        | 33                                                       | 43           | 100        |
| <i>MMAR_5455 (espK)</i>           | 100                                                      | 100          | 100        | <i>rv3879c (espK)</i>                       | 50                                                       | 58           | 99         |
| <i>MMAR_4352</i>                  | 29                                                       | 38           | 90         | <i>rv3878 (espJ)</i>                        | 41                                                       | 52           | 98         |
| <i>MMAR_4351</i>                  | 43                                                       | 52           | 100        | <i>rv3879c(espK)</i>                        | 46                                                       | 56           | 99         |
| <i>MMAR_0197</i>                  | 36                                                       | 52           | 33         | <i>rv3878(espJ)</i>                         | 41                                                       | 53           | 80         |
| <i>MMAR_0199</i>                  | 33                                                       | 43           | 99         | <i>rv3879c(espK)</i>                        | 33                                                       | 45           | 99         |
| <i>MMAR_0200</i>                  | 38                                                       | 47           | 38         | <i>rv3879c(espK)</i>                        | 29                                                       | 44           | 86         |
| <i>MMAR_1328</i>                  | 31                                                       | 42           | 69         | <i>rv3878(espJ)</i>                         | 51                                                       | 62           | 50         |
| <i>MMAR_1331</i>                  | 35                                                       | 43           | 99         | <i>rv3879c(espK)</i>                        | 30                                                       | 40           | 98         |
| <i>MMAR_5425</i><br>"orphan espK" | 48                                                       | 62           | 29         | <i>rv3879c(espK)</i>                        | 61                                                       | 72           | 75         |

**Table S3. *espK* and *espJ* paralogs in *M. marinum* are found in pairs.** *M. marinum* contains several paralogs of both *espJ* and *espK*. All of the *espJ* paralogs are found paired with an *espK* paralog. One *espK* paralog (*MMAR\_5425*) does not have an *espJ* partner nearby. *M. marinum espJ* (*MMAR\_5453*) and *espK* (*MMAR\_5455*) are found at the *esx-1* locus. *MMAR\_0197*, *MMAR\_0199*, *MMAR\_0200* are found at a partial duplication of the *esx-1* locus in *M. marinum*. *MMAR\_4352* /*MMAR\_4351* and *MMAR\_1328*/*MMAR\_1331* are not linked to a known *esx* locus. *M. marinum* paralogs were identified by using DELTA-BLAST to search the *M. marinum* genome with either *MMAR\_5453* or *MMAR\_5455*. The TB ortholog was identified as the top hit in a DELTA-BLAST search against the *M. tuberculosis* H37Rv genome. PE/PPE proteins are found at the *esx-1* locus (*MMAR\_5447*, *MMAR\_5448*), near the *espK/J* paralog pair at *MMAT\_4346*, and at the partial *Esx* duplication (*MMAR\_0183*, *pe35*, *ppe68\_1* (substrate) and *ppe51\_2*).

**Figure S1: MRM transitions monitored in this study**

|                                     | Transition Name/ID          | Q1 (m/z)                | Q3 (m/z) | Dwell (ms) | CE (V)                          | Transition Name/ID                     | Q1 (m/z)                     | Q3 (m/z) | Dwell (ms) | CE (V) |
|-------------------------------------|-----------------------------|-------------------------|----------|------------|---------------------------------|----------------------------------------|------------------------------|----------|------------|--------|
| *                                   | CFP10_GAAGTAAQAAVVR.T1      | 571.8                   | 943.5    | 12         | 33.6                            | EspA_VSSEPVGEHAQAASAQGGQGMGMPASAGSK.T1 | 745.3                        | 999.5    | 12         | 42.3   |
|                                     | CFP10_GAAGTAAQAAVVR.T2      | 571.8                   | 785.5    | 12         | 33.6                            | EspA_VSSEPVGEHAQAASAQGGQGMGMPASAGSK.T2 | 745.3                        | 929.4    | 12         | 42.3   |
|                                     | CFP10_GAAGTAAQAAVVR.T3      | 571.8                   | 714.4    | 12         | 33.6                            | EspA_VSSEPVGEHAQAASAQGGQGMGMPASAGSK.T3 | 745.3                        | 858.4    | 12         | 42.3   |
|                                     | CFP10_TQIDQVESTAGSLQAQWR.T1 | 673.3                   | 945.5    | 12         | 38.7                            | EspL_IDDGLLKEVGEPEVVSAR.T1             | 599.7                        | 913.5    | 12         | 35     |
|                                     | CFP10_TQIDQVESTAGSLQAQWR.T2 | 673.3                   | 688.4    | 12         | 38.7                            | EspL_IDDGLLKEVGEPEVVSAR.T2             | 599.7                        | 814.4    | 12         | 35     |
|                                     | CFP10_TQIDQVESTAGSLQAQWR.T3 | 673.3                   | 888.5    | 12         | 38.7                            | EspL_IDDGLLKEVGEPEVVSAR.T3             | 599.7                        | 757.4    | 12         | 35     |
|                                     | CFP10_ADDEQQALSSQMGF.T1     | 827.9                   | 999.4    | 12         | 46.4                            | EspL_FQSALDGTINQMNTGNFR.T1             | 672                          | 967.4    | 12         | 38.6   |
|                                     | CFP10_ADDEQQALSSQMGF.T2     | 827.9                   | 886.4    | 12         | 46.4                            | EspL_FQSALDGTINQMNTGNFR.T2             | 672                          | 839.4    | 12         | 38.6   |
|                                     | CFP10_ADDEQQALSSQMGF.T3     | 827.9                   | 840.4    | 12         | 46.4                            | EspL_FQSALDGTINQMNTGNFR.T3             | 672                          | 708.3    | 12         | 38.6   |
|                                     | #                           | ESAT6_LAAAWGGSGSEAYR.T1 | 465.9    | 682.3      | 12                              | 28.3                                   | EspL_GKDDTETVEVINGHQLTAVR.T1 | 618.6    | 975.4      | 12     |
| ESAT6_LAAAWGGSGSEAYR.T2             |                             | 465.9                   | 538.3    | 12         | 28.3                            | EspL_GKDDTETVEVINGHQLTAVR.T2           | 618.6                        | 747.3    | 12         | 35.9   |
| ESAT6_LAAAWGGSGSEAYR.T3             |                             | 465.9                   | 883.4    | 12         | 28.3                            | EspL_GKDDTETVEVINGHQLTAVR.T3           | 618.6                        | 699.4    | 12         | 35.9   |
| ESAT6_GVQQNWDSAQELNNSLQNLAR.T1      |                             | 829.4                   | 915.5    | 12         | 46.5                            | EspL_MEMDPQVAQVLAALAAAR.T1             | 581.6                        | 912.6    | 12         | 34.1   |
| ESAT6_GVQQNWDSAQELNNSLQNLAR.T2      |                             | 829.4                   | 801.5    | 12         | 46.5                            | EspL_MEMDPQVAQVLAALAAAR.T2             | 581.6                        | 841.5    | 12         | 34.1   |
| ESAT6_GVQQNWDSAQELNNSLQNLAR.T3      |                             | 829.4                   | 714.4    | 12         | 46.5                            | EspL_MEMDPQVAQVLAALAAAR.T3             | 581.6                        | 614.4    | 12         | 34.1   |
| 5455_EspK_GIPRPTGEYAGR.T1           |                             | 425.2                   | 552.3    | 13         | 26.3                            | CAP_AGIFQGVPEPVAALTK.T1                | 815                          | 827.5    | 12         | 45.7   |
| 5455_EspK_GIPRPTGEYAGR.T2           |                             | 425.2                   | 850.4    | 13         | 26.3                            | CAP_AGIFQGVPEPVAALTK.T2                | 815                          | 956.5    | 12         | 45.7   |
| 5455_EspK_GIPRPTGEYAGR.T3           |                             | 425.2                   | 466.2    | 13         | 26.3                            | CAP_AGIFQGVPEPVAALTK.T3                | 815                          | 1112.6   | 12         | 45.7   |
| 5455_EspK_VLHFLFDVMDAcR.T1          |                             | 526.3                   | 652.3    | 13         | 31.3                            | CAP_AWIADRPEIAEQLLR.T1                 | 594.3                        | 762.4    | 12         | 34.7   |
| 5455_EspK_VLHFLFDVMDAcR.T2          | 526.3                       | 826.4                   | 13       | 31.3       | CAP_AWIADRPEIAEQLLR.T2          | 594.3                                  | 705.9                        | 12       | 34.7       |        |
| 5455_EspK_VLHFLFDVMDAcR.T3          | 526.3                       | 925.5                   | 13       | 31.3       | CAP_AWIADRPEIAEQLLR.T3          | 594.3                                  | 670.4                        | 12       | 34.7       |        |
| 5455_EspK_KAAIASLIR.T1              | 471.8                       | 814.5                   | 13       | 28.6       | CAP_TSSATTITEVR.T1              | 583.3                                  | 977.5                        | 12       | 34.2       |        |
| 5455_EspK_KAAIASLIR.T2              | 471.8                       | 743.5                   | 13       | 28.6       | CAP_TSSATTITEVR.T2              | 583.3                                  | 819.5                        | 12       | 34.2       |        |
| 5455_EspK_KAAIASLIR.T3              | 471.8                       | 672.4                   | 13       | 28.6       | CAP_TSSATTITEVR.T3              | 583.3                                  | 718.4                        | 12       | 34.2       |        |
| EspB_ADLEPVNPPKPPAAIK.T1            | 553                         | 614.9                   | 13       | 32.6       | EspG_AAAGVLDSAHGR.T1            | 562.8                                  | 755.4                        | 12       | 33.1       |        |
| EspB_ADLEPVNPPKPPAAIK.T2            | 553                         | 918.6                   | 13       | 32.6       | EspG_AAAGVLDSAHGR.T2            | 562.8                                  | 982.5                        | 12       | 33.1       |        |
| EspB_ADLEPVNPPKPPAAIK.T3            | 553                         | 735.9                   | 13       | 32.6       | EspG_AAAGVLDSAHGR.T3            | 562.8                                  | 642.3                        | 12       | 33.1       |        |
| EspB_GHPTLADIVELER.T1               | 483.9                       | 805.4                   | 13       | 29.2       | EspG_YGLTPTTAR.T1               | 490.3                                  | 816.5                        | 12       | 29.5       |        |
| EspB_GHPTLADIVELER.T2               | 483.9                       | 692.3                   | 13       | 29.2       | EspG_YGLTPTTAR.T2               | 490.3                                  | 646.4                        | 12       | 29.5       |        |
| EspB_GHPTLADIVELER.T3               | 483.9                       | 645.4                   | 13       | 29.2       | EspG_YGLTPTTAR.T3               | 490.3                                  | 545.3                        | 12       | 29.5       |        |
| EspB_VAAAGESDFDCLK.T1               | 662.3                       | 954.4                   | 13       | 38.1       | EspG_LYTEIVTNP.K.T1             | 589.3                                  | 901.5                        | 12       | 34.5       |        |
| EspB_VAAAGESDFDCLK.T2               | 662.3                       | 825.4                   | 13       | 38.1       | EspG_LYTEIVTNP.K.T2             | 589.3                                  | 671.4                        | 12       | 34.5       |        |
| EspB_VAAAGESDFDCLK.T3               | 662.3                       | 738.4                   | 13       | 38.1       | EspG_LYTEIVTNP.K.T3             | 589.3                                  | 800.5                        | 12       | 34.5       |        |
| EspF_Ac-TGLLNVVPSFLK.T1             | 665.4                       | 903.5                   | 12       | 36         | EsxN_AAASLEAEHQAIVR.T1          | 697.9                                  | 923.5                        | 12       | 39.9       |        |
| EspF_Ac-TGLLNVVPSFLK.T2             | 665.4                       | 1016.6                  | 12       | 36         | EsxN_AAASLEAEHQAIVR.T2          | 697.9                                  | 852.5                        | 12       | 39.9       |        |
| EspF_Ac-TGLLNVVPSFLK.T3             | 665.4                       | 690.4                   | 12       | 36         | EsxN_AAASLEAEHQAIVR.T3          | 697.9                                  | 1052.5                       | 12       | 39.9       |        |
| EspF_NSAGTGLQGVGTGK.T1              | 595.3                       | 917.5                   | 12       | 34.8       | EsxN_AQAASLEAEHQAIVR.T1         | 531.9                                  | 923.5                        | 12       | 31.6       |        |
| EspF_NSAGTGLQGVGTGK.T2              | 595.3                       | 988.5                   | 12       | 34.8       | EsxN_AQAASLEAEHQAIVR.T2         | 531.9                                  | 697.9                        | 12       | 31.6       |        |
| EspF_NSAGTGLQGVGTGK.T3              | 595.3                       | 1075.6                  | 12       | 34.8       | EsxN_AQAASLEAEHQAIVR.T3         | 531.9                                  | 662.4                        | 12       | 31.6       |        |
| EspF_SATNVVSGIGSR.T1                | 574.3                       | 989.5                   | 12       | 33.7       | 5443_LLAEAQEELDR.T1             | 643.8                                  | 989.5                        | 12       | 37.2       |        |
| EspF_SATNVVSGIGSR.T2                | 574.3                       | 888.5                   | 12       | 33.7       | 5443_LLAEAQEELDR.T2             | 643.8                                  | 1060.5                       | 12       | 37.2       |        |
| EspF_SATNVVSGIGSR.T3                | 574.3                       | 1060.6                  | 12       | 33.7       | 5443_LLAEAQEELDR.T3             | 643.8                                  | 860.4                        | 12       | 37.2       |        |
| PPE68_GESLPGAGGTLTR.T1              | 608.3                       | 829.5                   | 12       | 35.4       | 5443_VVANMLAGLVIAEPK.T1         | 528                                    | 954.6                        | 12       | 31.4       |        |
| PPE68_GESLPGAGGTLTR.T2              | 608.3                       | 732.4                   | 12       | 35.4       | 5443_VVANMLAGLVIAEPK.T2         | 528                                    | 713.4                        | 12       | 31.4       |        |
| PPE68_GESLPGAGGTLTR.T3              | 608.3                       | 942.5                   | 12       | 35.4       | 5443_VVANMLAGLVIAEPK.T3         | 528                                    | 1067.6                       | 12       | 31.4       |        |
| PPE68_MLWHAMPPELNTAR.T1             | 556.3                       | 770.3                   | 12       | 32.8       | 5443_LLETNEGLR.T1               | 522.8                                  | 931.5                        | 12       | 31.1       |        |
| PPE68_MLWHAMPPELNTAR.T2             | 556.3                       | 897.5                   | 12       | 32.8       | 5443_LLETNEGLR.T2               | 522.8                                  | 818.4                        | 12       | 31.1       |        |
| PPE68_MLWHAMPPELNTAR.T3             | 556.3                       | 800.4                   | 12       | 32.8       | 5443_LLETNEGLR.T3               | 522.8                                  | 689.4                        | 12       | 31.1       |        |
| PPE68_LNSLGEAWTGGGSEK.T1            | 753.4                       | 892.4                   | 12       | 42.7       | 5443_DGRTPDFGQEAAMDLLAR.T1      | 665                                    | 974.4                        | 12       | 38.2       |        |
| PPE68_LNSLGEAWTGGGSEK.T2            | 753.4                       | 821.4                   | 12       | 42.7       | 5443_DGRTPDFGQEAAMDLLAR.T2      | 665                                    | 890.5                        | 12       | 38.2       |        |
| PPE68_LNSLGEAWTGGGSEK.T3            | 753.4                       | 1191.6                  | 12       | 42.7       | 5443_DGRTPDFGQEAAMDLLAR.T3      | 665                                    | 819.4                        | 12       | 38.2       |        |
| GroES_EKPQEGTVAVGPGR.T1             | 508.6                       | 869.4                   | 12       | 30.4       | 5446_LGDVNETQIDR.T1             | 630.3                                  | 974.5                        | 12       | 36.5       |        |
| GroES_EKPQEGTVAVGPGR.T2             | 508.6                       | 556.3                   | 12       | 30.4       | 5446_LGDVNETQIDR.T2             | 630.3                                  | 875.4                        | 12       | 36.5       |        |
| GroES_EKPQEGTVAVGPGR.T3             | 508.6                       | 968.5                   | 12       | 30.4       | 5446_LGDVNETQIDR.T3             | 630.3                                  | 761.4                        | 12       | 36.5       |        |
| GROES_YGGEYLLSAR.T1                 | 685.8                       | 964.5                   | 12       | 39.3       | 5446_VVAEMQAVMR.T1              | 567.3                                  | 935.4                        | 12       | 33.4       |        |
| GROES_YGGEYLLSAR.T2                 | 685.8                       | 835.5                   | 12       | 39.3       | 5446_VVAEMQAVMR.T2              | 567.3                                  | 864.4                        | 12       | 33.4       |        |
| GroEL_AEIENSDDSDYDR.T1              | 707.3                       | 971.4                   | 12       | 37         | 5446_VVAEMQAVMR.T3              | 567.3                                  | 735.4                        | 12       | 33.4       |        |
| GroEL_AEIENSDDSDYDR.T2              | 707.3                       | 1100.4                  | 12       | 37         | 5446_VGSIAMYR.T1                | 448.7                                  | 797.4                        | 12       | 27.4       |        |
| MMAR2929_TPDIAIQDIHTLGEK.T1         | 855.4                       | 1212.6                  | 12       | 45         | 5446_VGSIAMYR.T2                | 448.7                                  | 740.4                        | 12       | 27.4       |        |
| MMAR2929_TPDIAIQDIHTLGEK.T2         | 855.4                       | 1141.6                  | 12       | 45         | 5446_VGSIAMYR.T3                | 448.7                                  | 653.3                        | 12       | 27.4       |        |
| GroEL2_DETTIVEGAGSDAIAGR.T1         | 888.9                       | 1217.6                  | 12       | 45         | EspR_GPHTSAEVIAALK.T1           | 431.9                                  | 779.4                        | 12       | 26.6       |        |
| GroEL2_DETTIVEGAGSDAIAGR.T2         | 888.9                       | 1118.5                  | 12       | 45         | EspR_GPHTSAEVIAALK.T2           | 431.9                                  | 680.3                        | 12       | 26.6       |        |
| EspJ_AEPLAVDPAR.T1                  | 519.8                       | 838.5                   | 12       | 31         | EspR_GPHTSAEVIAALK.T3           | 431.9                                  | 515.4                        | 12       | 26.6       |        |
| EspJ_AEPLAVDPAR.T2                  | 519.8                       | 741.4                   | 12       | 31         | EspR_SQGLSTQAQQEIVER.T1         | 837.4                                  | 972.5                        | 12       | 46.9       |        |
| EspJ_AEPLAVDPAR.T3                  | 519.8                       | 628.3                   | 12       | 31         | EspR_SQGLSTQAQQEIVER.T2         | 837.4                                  | 901.5                        | 12       | 46.9       |        |
| EspJ_TASSMSTAADIYAK.T1              | 472.9                       | 680.4                   | 12       | 28.6       | EspR_SQGLSTQAQQEIVER.T3         | 837.4                                  | 773.4                        | 12       | 46.9       |        |
| EspJ_TASSMSTAADIYAK.T2              | 472.9                       | 609.3                   | 12       | 28.6       | EspR_TNPSTATMAALANFFR.T1        | 571.6                                  | 909.5                        | 12       | 33.6       |        |
| EspJ_TASSMSTAADIYAK.T3              | 472.9                       | 939.5                   | 12       | 28.6       | EspR_TNPSTATMAALANFFR.T2        | 571.6                                  | 838.5                        | 12       | 33.6       |        |
| EspE_APIDAGSNTGGNEGTLT.T1           | 857.9                       | 989.5                   | 12       | 47.9       | EspR_TNPSTATMAALANFFR.T3        | 571.6                                  | 654.3                        | 12       | 33.6       |        |
| EspE_APIDAGSNTGGNEGTLT.T2           | 857.9                       | 1103.5                  | 12       | 47.9       | 5444_ATNQLYVLLSGQLHPVYNLSAR.T1  | 853.5                                  | 1193.6                       | 12       | 47.7       |        |
| EspE_APIDAGSNTGGNEGTLT.T3           | 857.9                       | 1190.6                  | 12       | 47.9       | 5444_ATNQLYVLLSGQLHPVYNLSAR.T2  | 853.5                                  | 1016.1                       | 12       | 47.7       |        |
| EspE_MIDGVYK.T1                     | 413.2                       | 694.4                   | 12       | 25.7       | 5444_ATNQLYVLLSGQLHPVYNLSAR.T3  | 853.5                                  | 1072.6                       | 12       | 47.7       |        |
| EspE_MIDGVYK.T2                     | 413.2                       | 581.3                   | 12       | 25.7       | EccE_IADGLASNGVDVAVCGR.T1       | 787.9                                  | 1183.6                       | 12       | 44.4       |        |
| EspE_MIDGVYK.T3                     | 413.2                       | 466.3                   | 12       | 25.7       | EccE_IADGLASNGVDVAVCGR.T2       | 787.9                                  | 1105.5                       | 12       | 44.4       |        |
| EspH_AANMSESALEAEEFVIADLAR.T1       | 741                         | 904.5                   | 12       | 42.1       | EccE_IADGLASNGVDVAVCGR.T3       | 787.9                                  | 1034.5                       | 12       | 44.4       |        |
| EspH_AANMSESALEAEEFVIADLAR.T2       | 741                         | 946.4                   | 12       | 42.1       | EspE_LLEDLLSVHCPDLEADVVSAGYR.T1 | 857.8                                  | 1173.1                       | 12       | 47.9       |        |
| EspH_AANMSESALEAEEFVIADLAR.T3       | 741                         | 757.5                   | 12       | 42.1       | EccE_LLEDLLSVHCPDLEADVVSAGYR.T3 | 857.8                                  | 937.9                        | 12       | 47.9       |        |
| EspH_YEVDYTSR.T1                    | 516.7                       | 869.4                   | 12       | 30.8       | EccE_YLVSATR.T1                 | 440.7                                  | 604.3                        | 12       | 27         |        |
| EspH_YEVDYTSR.T2                    | 516.7                       | 740.4                   | 12       | 30.8       | EccE_YLVSATR.T2                 | 440.7                                  | 505.3                        | 12       | 27         |        |
| EspH_YEVDYTSR.T3                    | 516.7                       | 641.3                   | 12       | 30.8       | EccE_YLVSATR.T3                 | 440.7                                  | 717.4                        | 12       | 27         |        |
| EspH_AAQHTFMVEAMASELSEDETEEGALLR.T1 | 989.1                       | 1146.6                  | 12       | 54.5       |                                 |                                        |                              |          |            |        |
| EspH_AAQHTFMVEAMASELSEDETEEGALLR.T2 | 989.1                       | 886.4                   | 12       | 54.5       |                                 |                                        |                              |          |            |        |
| EspH_AAQHTFMVEAMASELSEDETEEGALLR.T3 | 989.1                       | 916.5                   | 12       | 54.5       |                                 |                                        |                              |          |            |        |

\* CFP-10 is synonymous with EsxB

# ESAT-6 is synonymous with EsxA

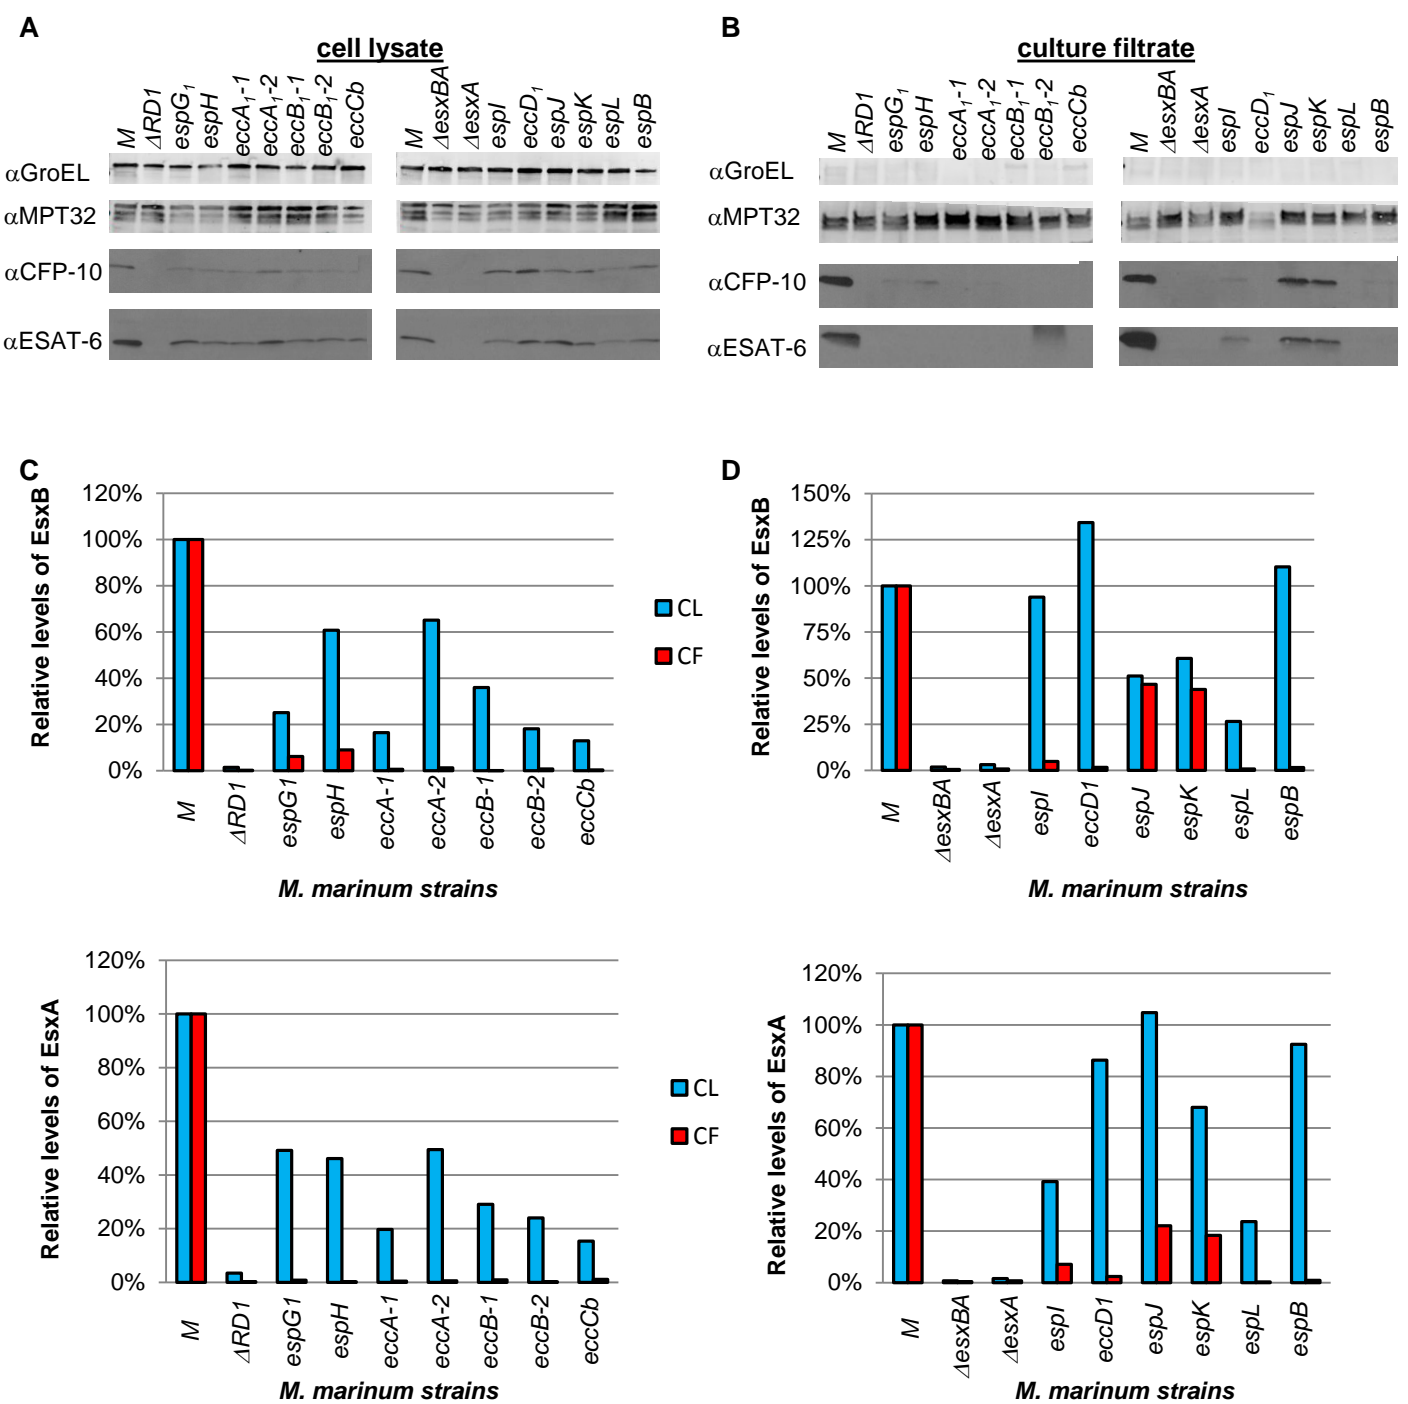

**Figure S2: Western blot analysis for the production and secretion of EsxA and EsxB.** **A)** Western blot analysis of cell lysates and **B)** culture filtrates generated from WT *M. marinum* M strain and the ESX-1-deficient strains bearing transposon insertions or deletions in the extended RD1 locus. MPT32 served as a loading control for the CFs. GroEL, a cytosolic protein, served as a loading control for the CLs and a lysis control for the CFs. Western blot images were quantified using Image J. **C)** Quantification of the blots in panel A **D)** Quantification of the blots in panel B. CL proteins were normalized to GroEL. CF proteins were normalized to MPT-32. All results were normalized to the wild-type levels to allow for comparison between gels.



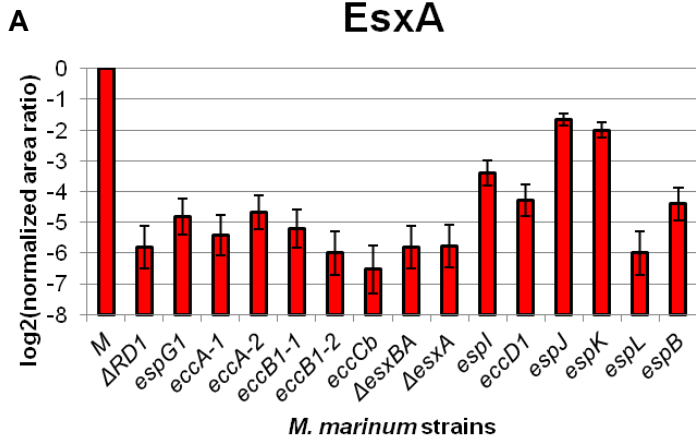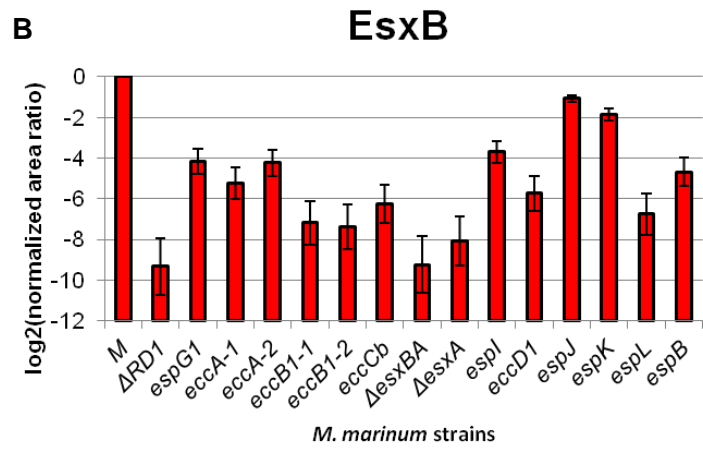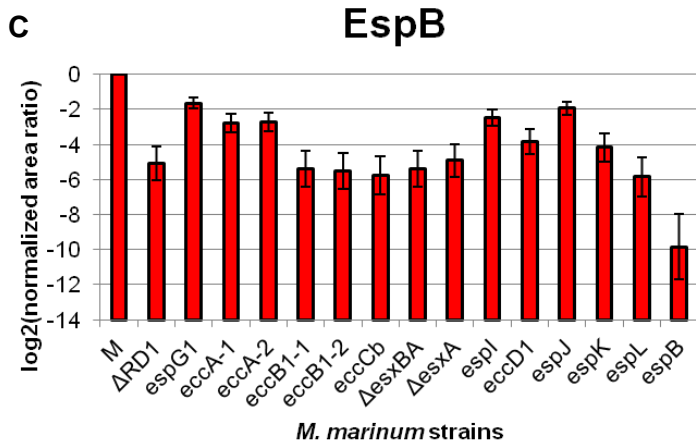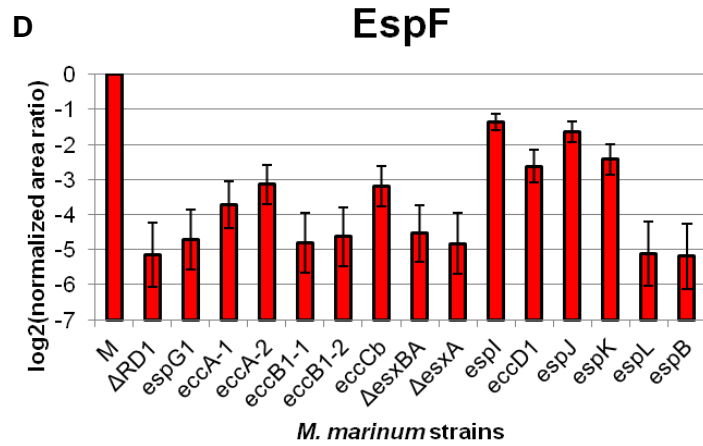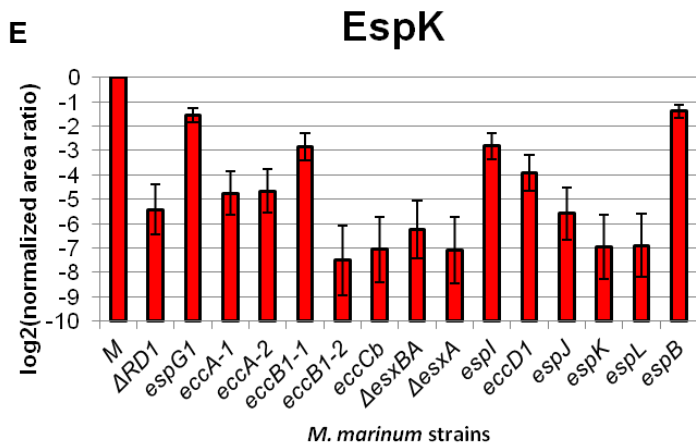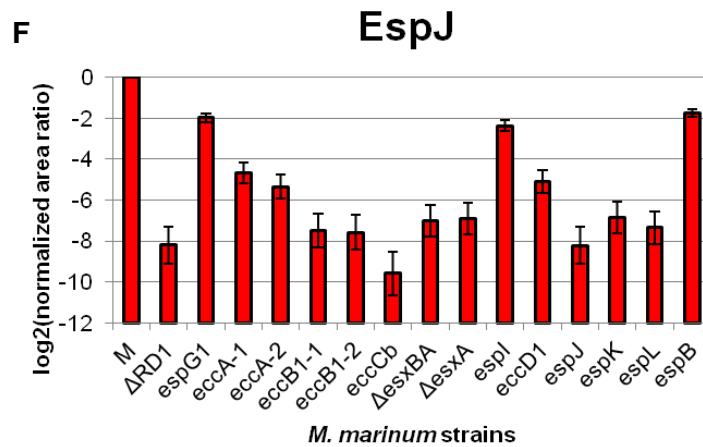



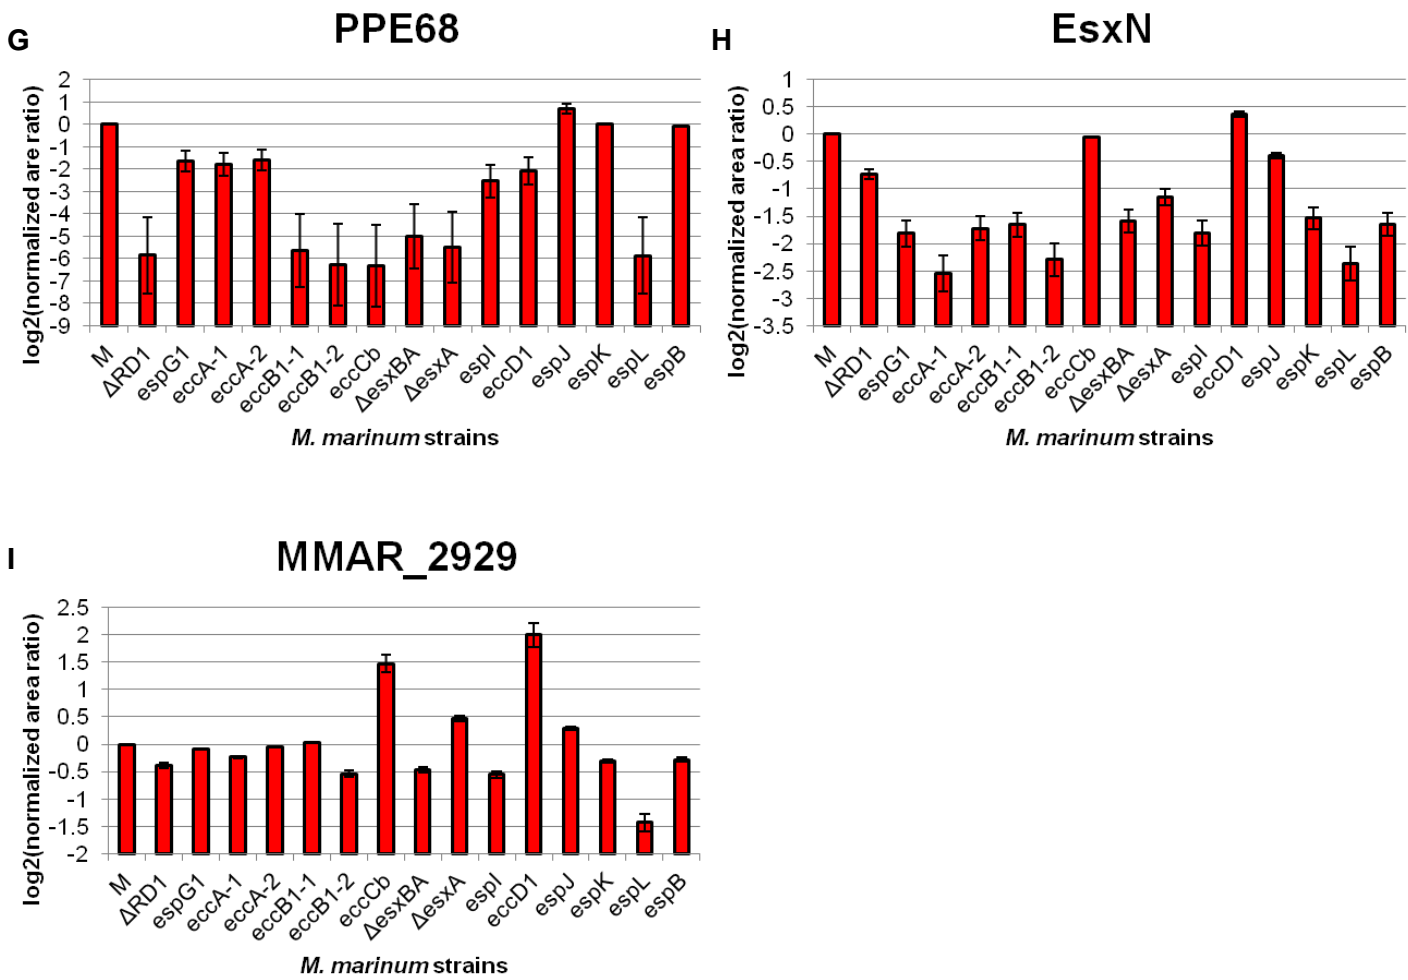

**Figure S4: Log 2 transformed normalized area ratios for protein levels in the culture filtrates.**  
 The normalized area ratio data for secreted proteins in the culture filtrate presented in Figures 2 and 3 were log<sub>2</sub> transformed in Microsoft Excel and plotted. Error bars represent the average propagated standard error and were calculated as described in the materials and methods section **A) EsxA B) EsxB C) EspB D) EspF E) EspK F) EspJ G) PPE68 H) EsxN I) MMAR\_2929.**

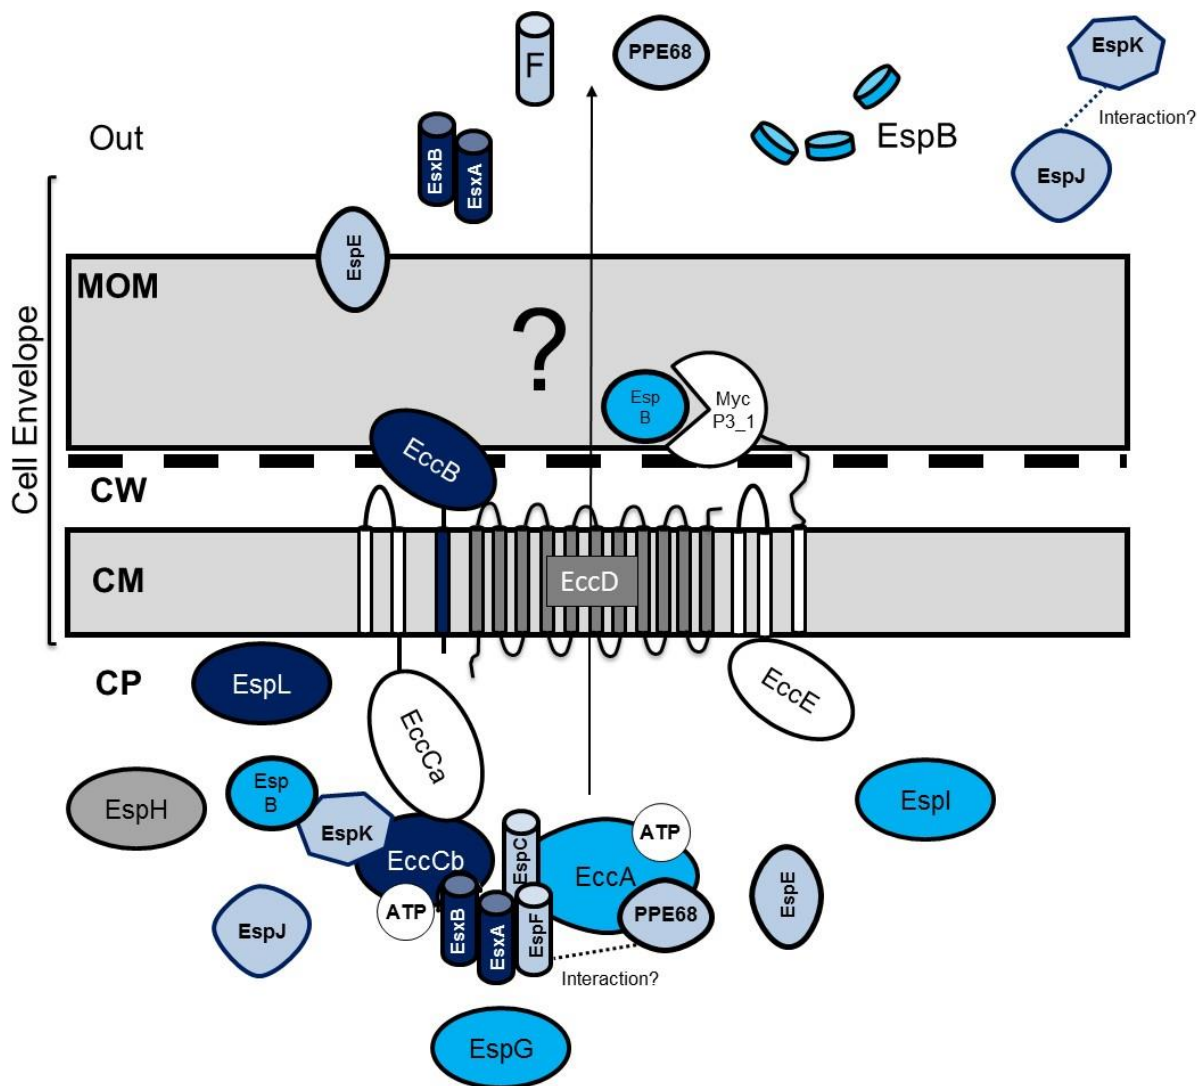

**Figure S5. A model of Esx-1 export in *M. marinum*.** The Esx-1 exporter promotes the translocation of substrates across the cytoplasmic membrane (CM) of *M. marinum*. The mechanism of transport across the MOM (mycolate outer membrane) is not known, and is indicated with a question mark. The membrane complex includes EccCb, EccD and EccE. EccCa, EccCb and EccA are all AAA ATPase proteins. Substrates include EsxA, EsxB, EspF, EspC (in *M. tb*), EspE, and EspK, EspJ and PPE68, which were defined in this study. Our findings indicate that EspL, EccB, EccCb, EsxA and EsxB (Dark Blue) are required for the export of all *esx-1* encoded substrates (light blue). In the absence of EspB, EspG, EccA and EspI (medium blue) the levels of all *esx-1* proteins measured in this study were reduced. We propose that these proteins function as chaperones for *esx-1*. Proteins in white were not measured in this study. Potential interactions based on the correlation coefficients, which need further testing, are indicated by dotted lines (EspK and EspJ, EspF, PPE68).

**Figure S6. The R code used to calculate the significance of correlation**

```
# Read in data, compute and save Pearson's correlation scores
data_pel <- read.csv("pellet_data.csv", sep=",", head=T, row.names=1)
cor_data_pel <- as.matrix(cor(data_pel, use="everything", method="pearson"))
write.table(cor_data_pel, "corr_pellet.csv", sep=",")

data_sup <- read.csv("supernatant_data.csv", sep=",", head=T, row.names=1)
cor_data_sup <- as.matrix(cor(data_sup, use="everything", method="pearson"))
write.table(cor_data_sup, "corr_supernatant.csv", sep=",")

# Function to extract p-values from fitting linear models
lmp <- function (modelobject) {
  if (class(modelobject) != "lm") stop("Not an object of class 'lm' ")
  f <- summary(modelobject)$fstatistic
  p <- pf(f[1],f[2],f[3],lower.tail=F)
  attributes(p) <- NULL
  return(p)
}

# Fitting linear models and output a matrix of p-values
a = 1
b = 1
pvalsout_pel = NULL

for (a in 1:length(data_pel[1,])){
  for (b in 1:length(data_pel[1,])){
    pvals = lmp(lm(data_pel[,a] ~ data_pel[,b]))
    pvalsout_pel = c(pvalsout_pel, pvals)
    b = b + 1
  }
  a = a + 1
}

output_pel = matrix(pvalsout_pel, nrow = length(data_pel[1,]), ncol =
length(data_pel[1,]), byrow=T)
write.table(output_pel, "p-values_pellet.csv", sep = ",")

c = 1
d = 1
pvalsout_sup = NULL

for (c in 1:length(data_sup[1,])){
  for (d in 1:length(data_sup[1,])){
    pvals = lmp(lm(data_sup[,c] ~ data_sup[,d]))
    pvalsout_sup = c(pvalsout_sup, pvals)
    d = d + 1
  }
  c = c + 1
}

output_sup = matrix(pvalsout_sup, nrow = length(data_sup[1,]), ncol =
length(data_sup[1,]), byrow=T)
write.table(output_sup, "p-values_supernatant.csv", sep = ",")
```
